# Supplementary material for: Effect of Laparoscopic Sleeve Gastrectomy on the Pharmacokinetics of Oral Omeprazole Using a Population Approach
Source: MDPI journal article supplement (doi:10.3390/pharmaceutics14101986), 2022-09-20
Supplement: s1 [file s1]

(a) pre-surgery

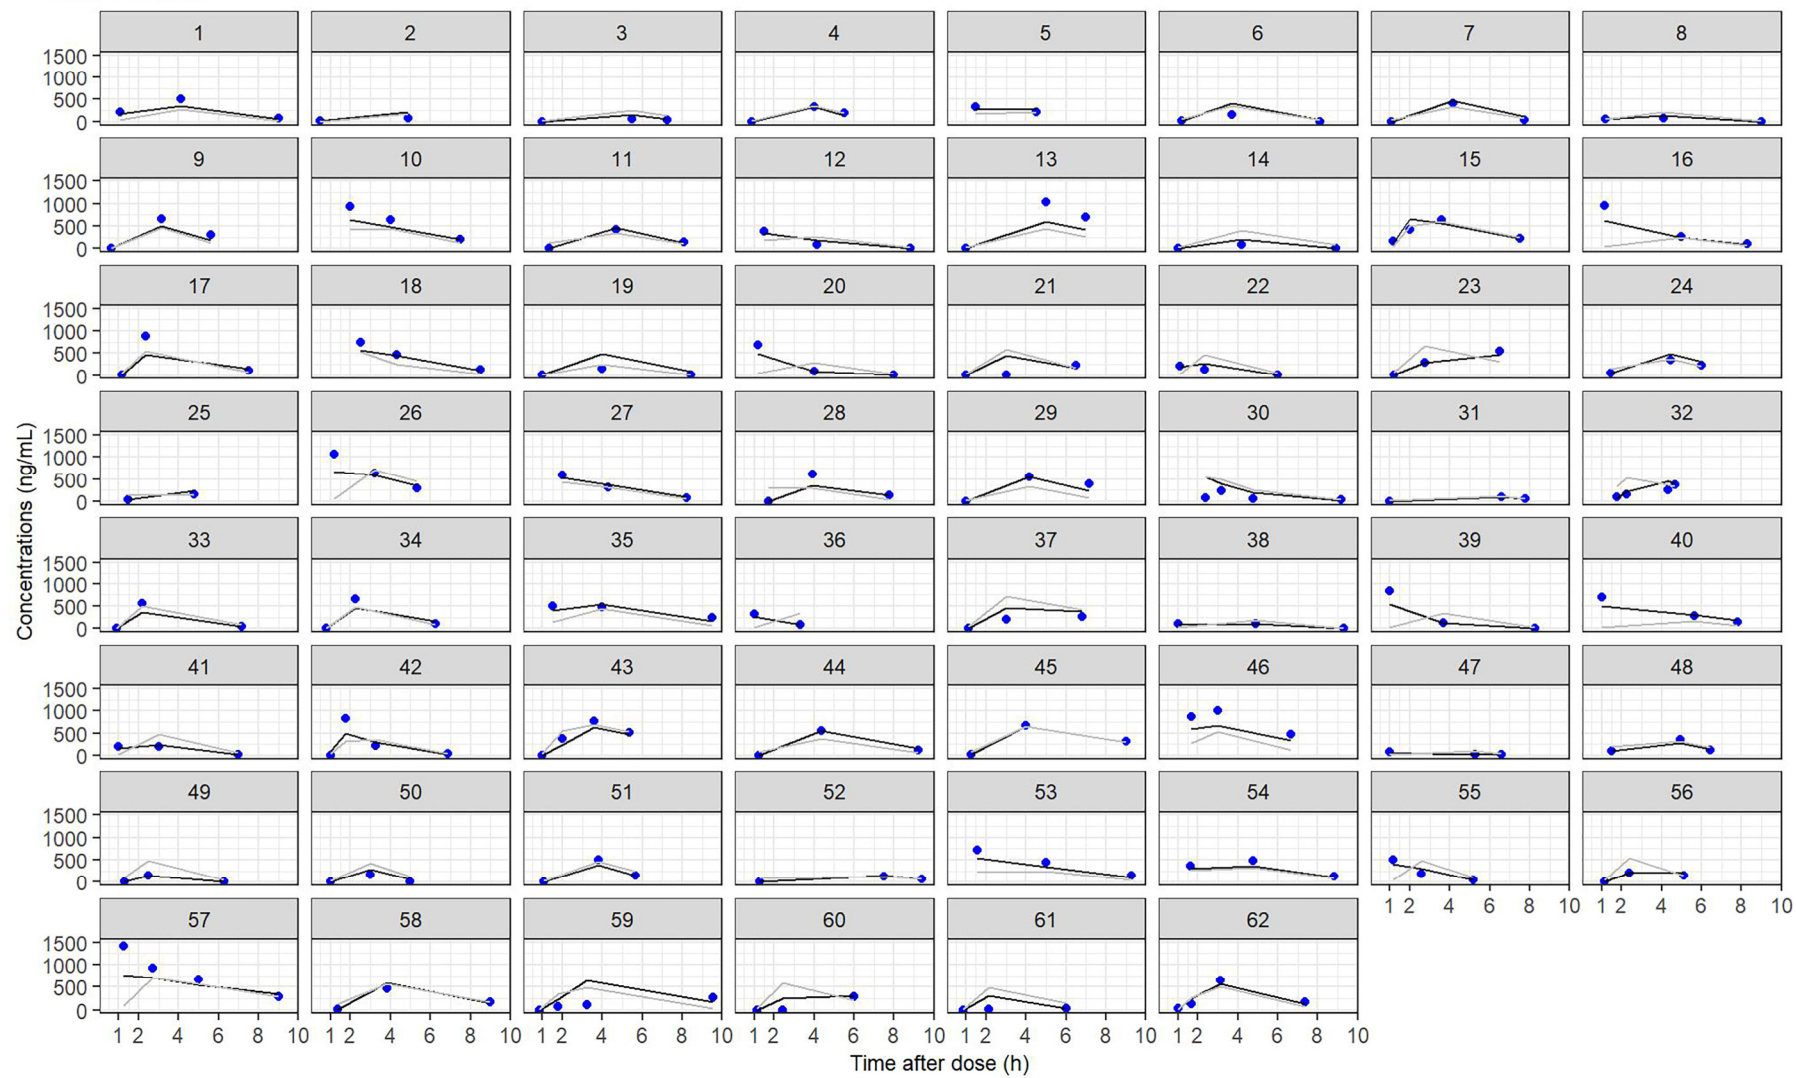

(b) 7 days post-LSG

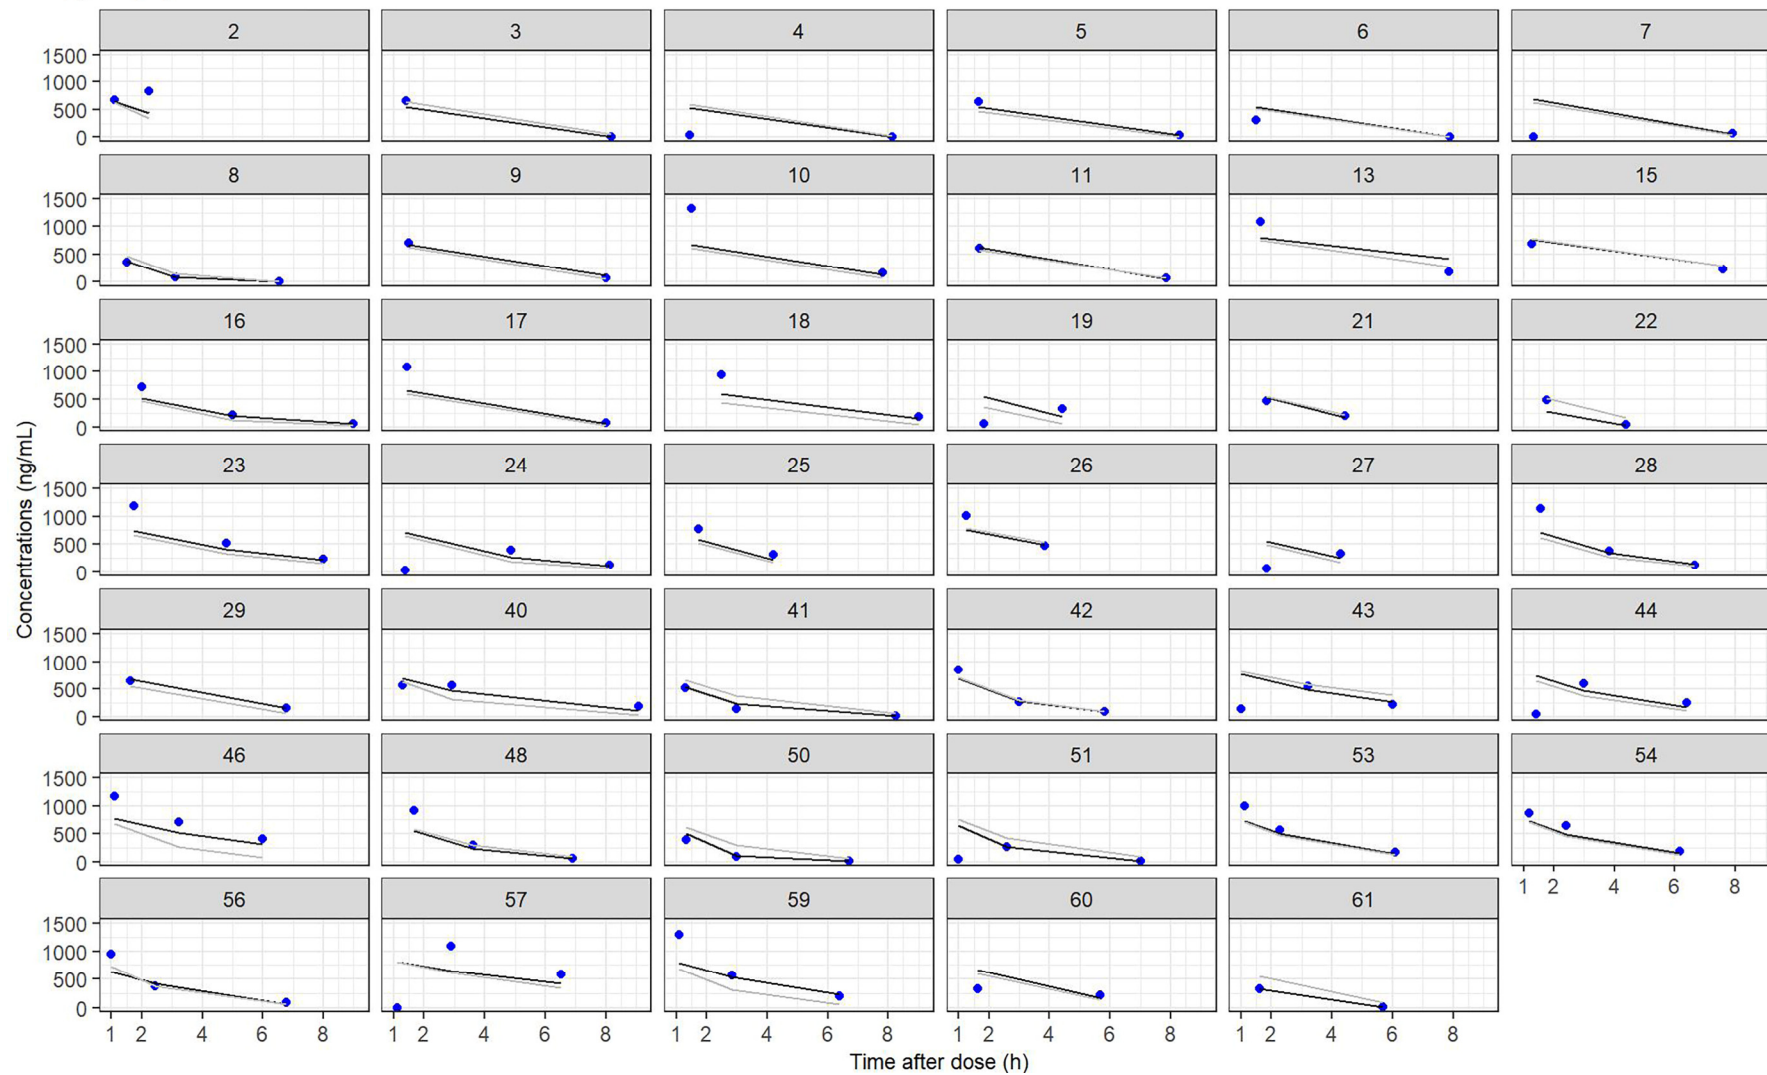

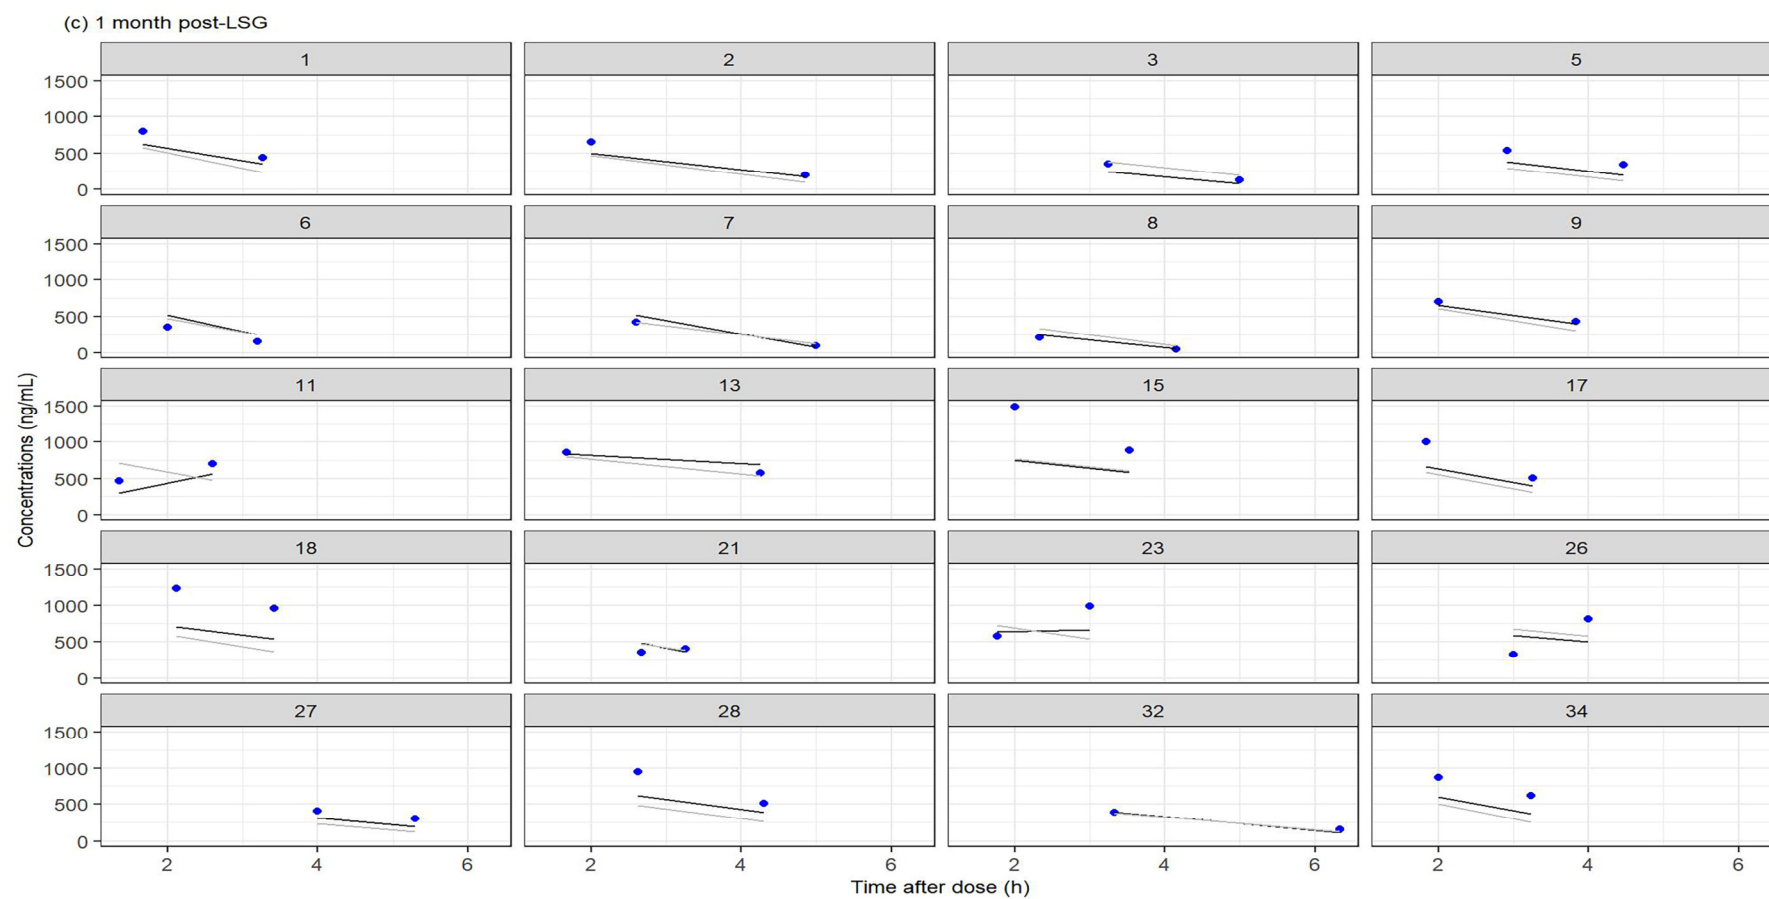

**Figure S1.** Individual concentration-time curves of omeprazole in obese patients at three visits. Blue dots represent observed concentrations, and grey and black lines represent population predictions and individual predictions, respectively.
