# Supplementary material for: Effect of Laparoscopic Sleeve Gastrectomy on the Pharmacokinetics of Oral Omeprazole Using a Population Approach
Source: MDPI journal article supplement (doi:10.3390/pharmaceutics14101986), 2022-09-20
Supplement: s1 [file s1]

## NONMEM code

\$SUBROUTINES ADVAN5

\$MODEL

COMP=(1);DOSE

COMP=(2);CENTRAL

COMP=(3);transit com1

COMP=(4);transit com2

COMP=(5);transit com3

COMP=(6);transit com4

COMP=(7);transit com5

COMP=(8);transit com6

COMP=(9);transit com7

COMP=(10);transit com8

COMP=(11);transit com9

COMP=(12);transit com10

COMP=(13);transit com11

COMP=(14);transit com12

\$PK

MTT= THETA(1)\*EXP(ETA(1)) ; Mean transit time

IF(VISIT.EQ.2) MTT=THETA(2)\*MTT

IF(VISIT.EQ.3) MTT=THETA(3)\*MTT

CL= THETA(4)\*EXP(ETA(2)+IOVCL) ; Drug elimination clearance

IF(CYP.EQ.2) CL=THETA(5)\*CL

IF(CYP.EQ.3) CL=THETA(6)\*CL

IF(LF.EQ.2) CL=THETA(7)\*CL

V=THETA(8) ; Volume of the central compartment

VISIT1=0

IF(VISIT.EQ.1) VISIT1=1

VISIT2=0

IF(VISIT.EQ.2) VISIT2=1

VISIT3=0

IF(VISIT.EQ.3) VISIT3=1

IOVCL=VISIT1\*ETA(3)+VISIT2\*ETA(4)+VISIT3\*ETA(5) ; Inter-occasion variability of CL

NT=12 ; Number of transit compartments  
KTR=(NT+1)/MTT ; Transit rate constant

K13=KTR  
K34=KTR  
K45=KTR  
K56=KTR  
K67=KTR  
K78=KTR  
K89=KTR  
K910=KTR  
K10T11=KTR  
K11T12=KTR  
K12T13=KTR  
K13T14=KTR  
K14T2=KTR

K20=CL/V  
S2 = V/1000

\$ERROR  
DEL=0  
IF (F.LE.0.0001) DEL=1  
IPRE=F  
W1= F  
W2= 1  
IRES= DV-IPRE  
IWRE=IRES/(W1+W2)  
Y = F + W1\*ERR(1)
